# Supplementary material for: Inhibition of Host Vacuolar H+-ATPase Activity by a Legionella pneumophila Effector
Source: PubMed Central journal article supplement (PMC2841630; doi:10.1371/journal.ppat.1000822), 2010-03-19
Supplement: ppat.1000822.s005.pdf [file ppat.1000822.s005.pdf]

**A**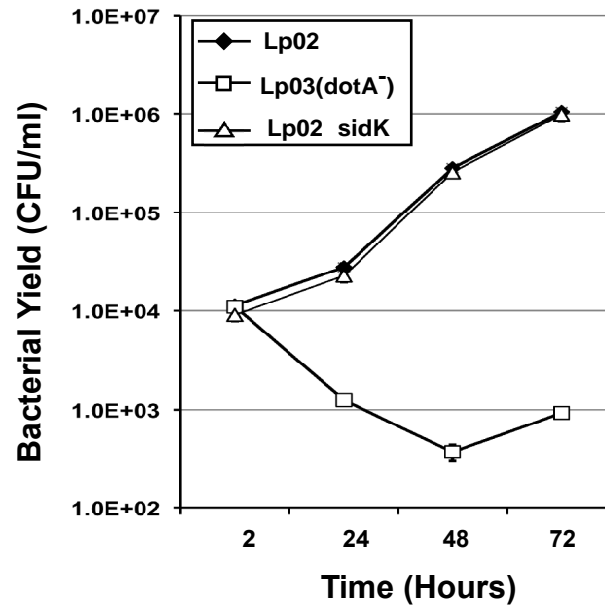**B**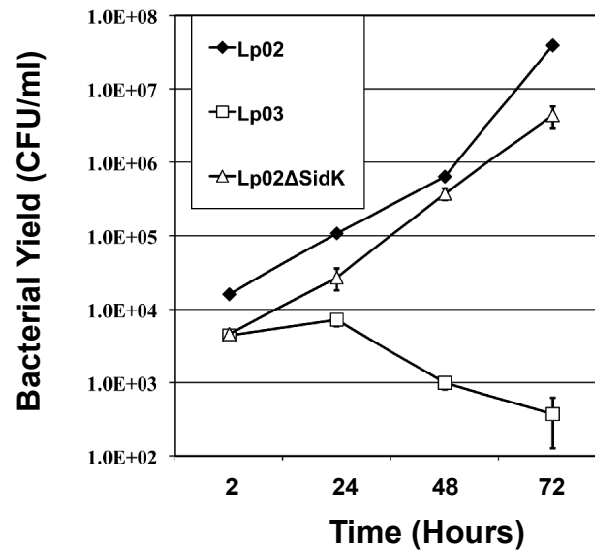

**Fig. S1** Deletion of *sidK* did not affect intracellular growth of *L. pneumophila*. Indicated bacterial strains grown to post-exponential phase were used to infect mouse macrophages (**A**) or *Dictyostelium discoideum* (**B**). Infections were synchronized 1 h after uptake and the total bacterial counts at indicated time points were determined by lysing infected cells with 0.02% saponin and plating appropriately diluted lysates on CYE plates. Data shown are one representative experiment done in triplicates. Similar results are obtained in more than three independent experiments.
