# Supplementary material for: Inhibition of Host Vacuolar H+-ATPase Activity by a Legionella pneumophila Effector
Source: PubMed Central journal article supplement (PMC2841630; doi:10.1371/journal.ppat.1000822), 2010-03-19
Supplement: ppat.1000822.s006.pdf [file ppat.1000822.s006.pdf]

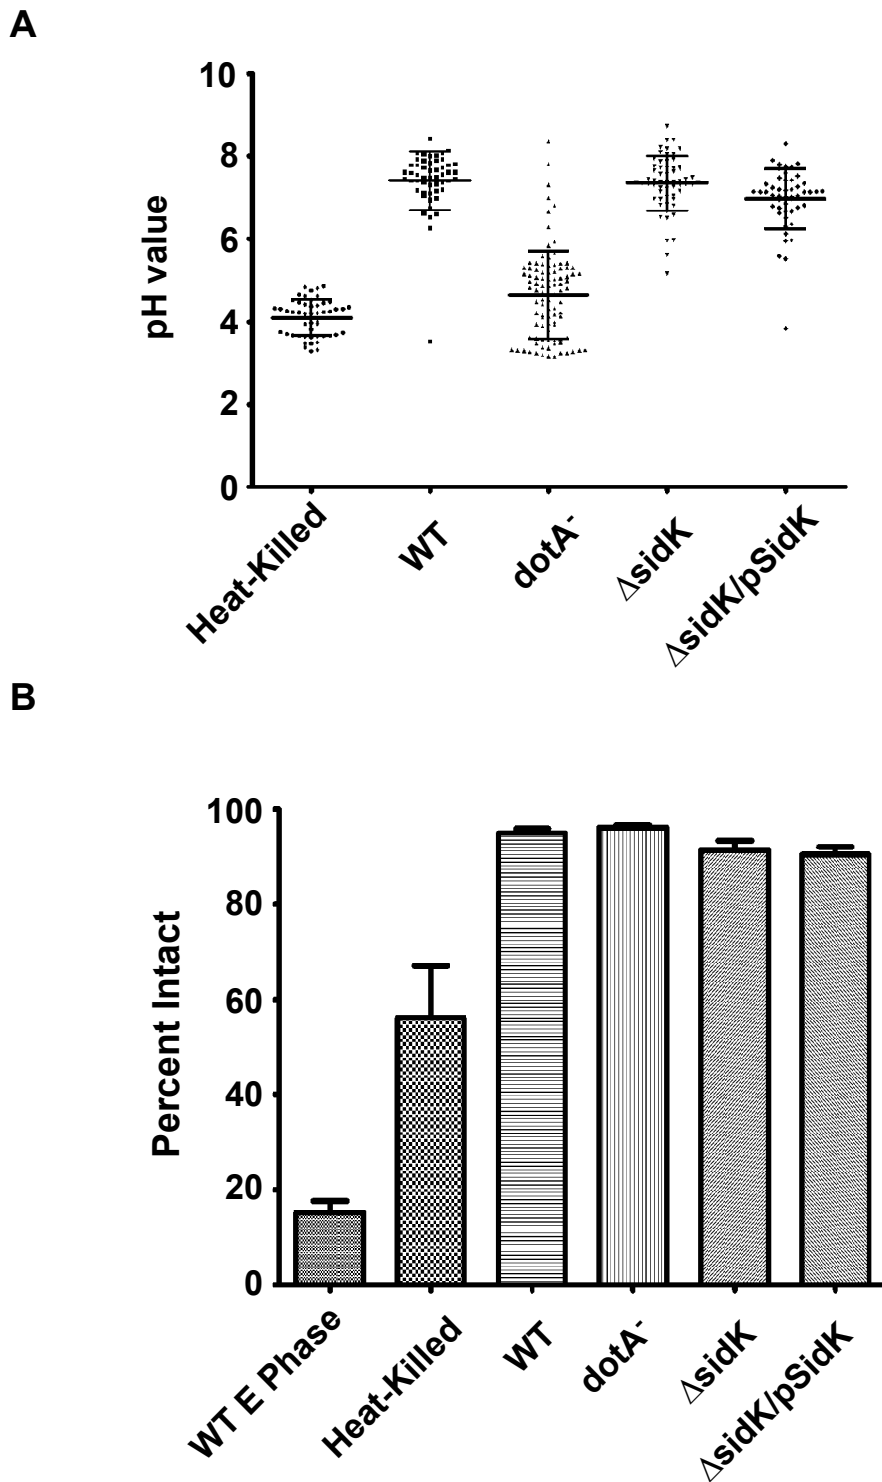

**Fig. S2** Vacuoles containing the *sidK* deletion mutant maintain a neutral luminal pH. Mouse macrophages were infected with indicated *L. pneumophila* strains for 2 hours and vacuolar pH of the phagosomes was measured as described in Materials and Methods (**A**). The integrity of the internalized bacteria also was examined (**B**). More than 50 vacuoles were scored for each coverslip. Similar results were obtained in two independent experiments.
