# Supplementary material for: Inhibition of Host Vacuolar H+-ATPase Activity by a Legionella pneumophila Effector
Source: PubMed Central journal article supplement (PMC2841630; doi:10.1371/journal.ppat.1000822), 2010-03-19
Supplement: ppat.1000822.s007.pdf [file ppat.1000822.s007.pdf]

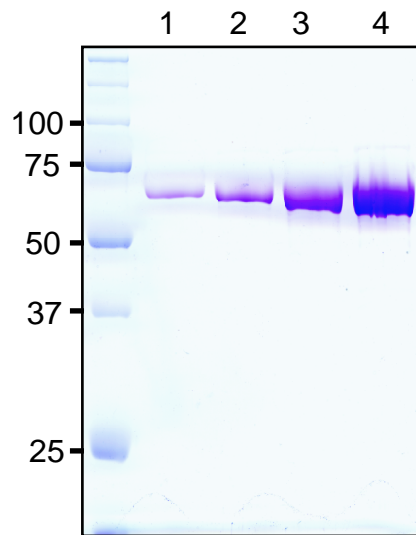

**Fig. S3** Purification of SidK from *L. pneumophila*. A derivative of the avirulent strain Lp03 containing pZL1333 that direct the expression of His<sub>6</sub>-SidK was grown in AYE broth and the expression of the protein was induced with IPTG for 16 hours. His<sub>6</sub>-SidK was first purified by a Ni<sup>2+</sup>column followed by FPLC with an AKTA system. Fractions containing the protein were pooled and dialysed in TBS buffer. Image shown are different amount of His<sub>6</sub>-SidK resolved SDS-PAGE and stained by Coomassie bright blue staining. Lanes: 1, 1 µg; 2, 2 µg; 3, 4 µg; 4, 8 µg.
