# Supplementary material for: Inhibition of Host Vacuolar H+-ATPase Activity by a Legionella pneumophila Effector
Source: PubMed Central journal article supplement (PMC2841630; doi:10.1371/journal.ppat.1000822), 2010-03-19
Supplement: ppat.1000822.s009.pdf [file ppat.1000822.s009.pdf]

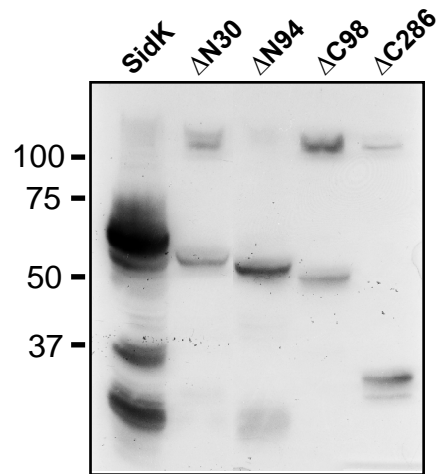

**Fig. S5** Expression of *sidK* mutants in yeast. Indicated mutants were cloned into p425GPD, a start codon (ATG) was added to N-terminal deletion mutant. Samples were processed as described for Fig. 1 and proteins were detected with an anti-SidK antibody.
